# Supplementary material
Source: PubMed Central journal article supplement (PMC6699514)
Supplement: NIHMS877127-supplement-supplemental.pdf [file NIHMS877127-supplement-supplemental.pdf]

Supplemental Information

**dFzef/Earmuff Maintains the Restricted  
Developmental Potential of Intermediate  
Neural Progenitors in *Drosophila***

Mo Weng, Krista L. Golden, and Cheng-Yu Lee

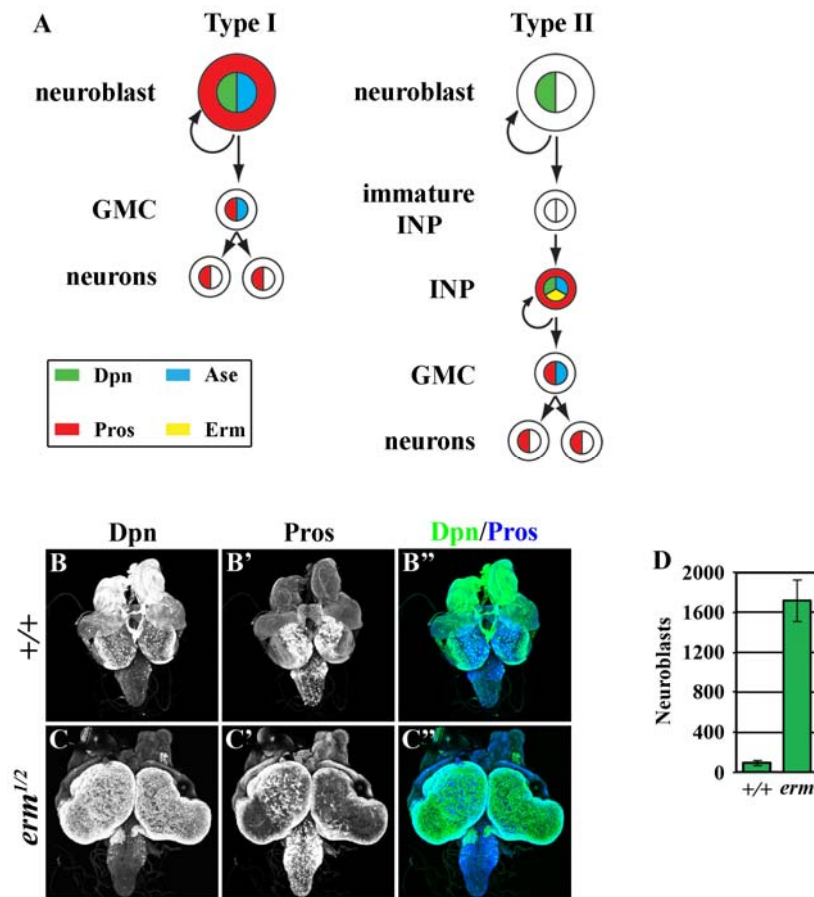

**Figure S1. *erm* mutant brains show a dramatic increase in neuroblasts**

(A) A type I neuroblast generates a daughter type I neuroblast and a GMC that produces two neurons. A type II neuroblast generates a daughter type II neuroblast and an immature INP that becomes an INP undergoing limited rounds of asymmetric divisions.

(B and C) *erm* mutant larvae showed dramatically enlarged brain lobes containing supernumerary neuroblasts compared to similarly staged wild type control larvae.

(D) *erm* mutant larval brains contained more than 10-fold increase in ectopic neuroblasts ( $Dpn^+Pros^-$ ).

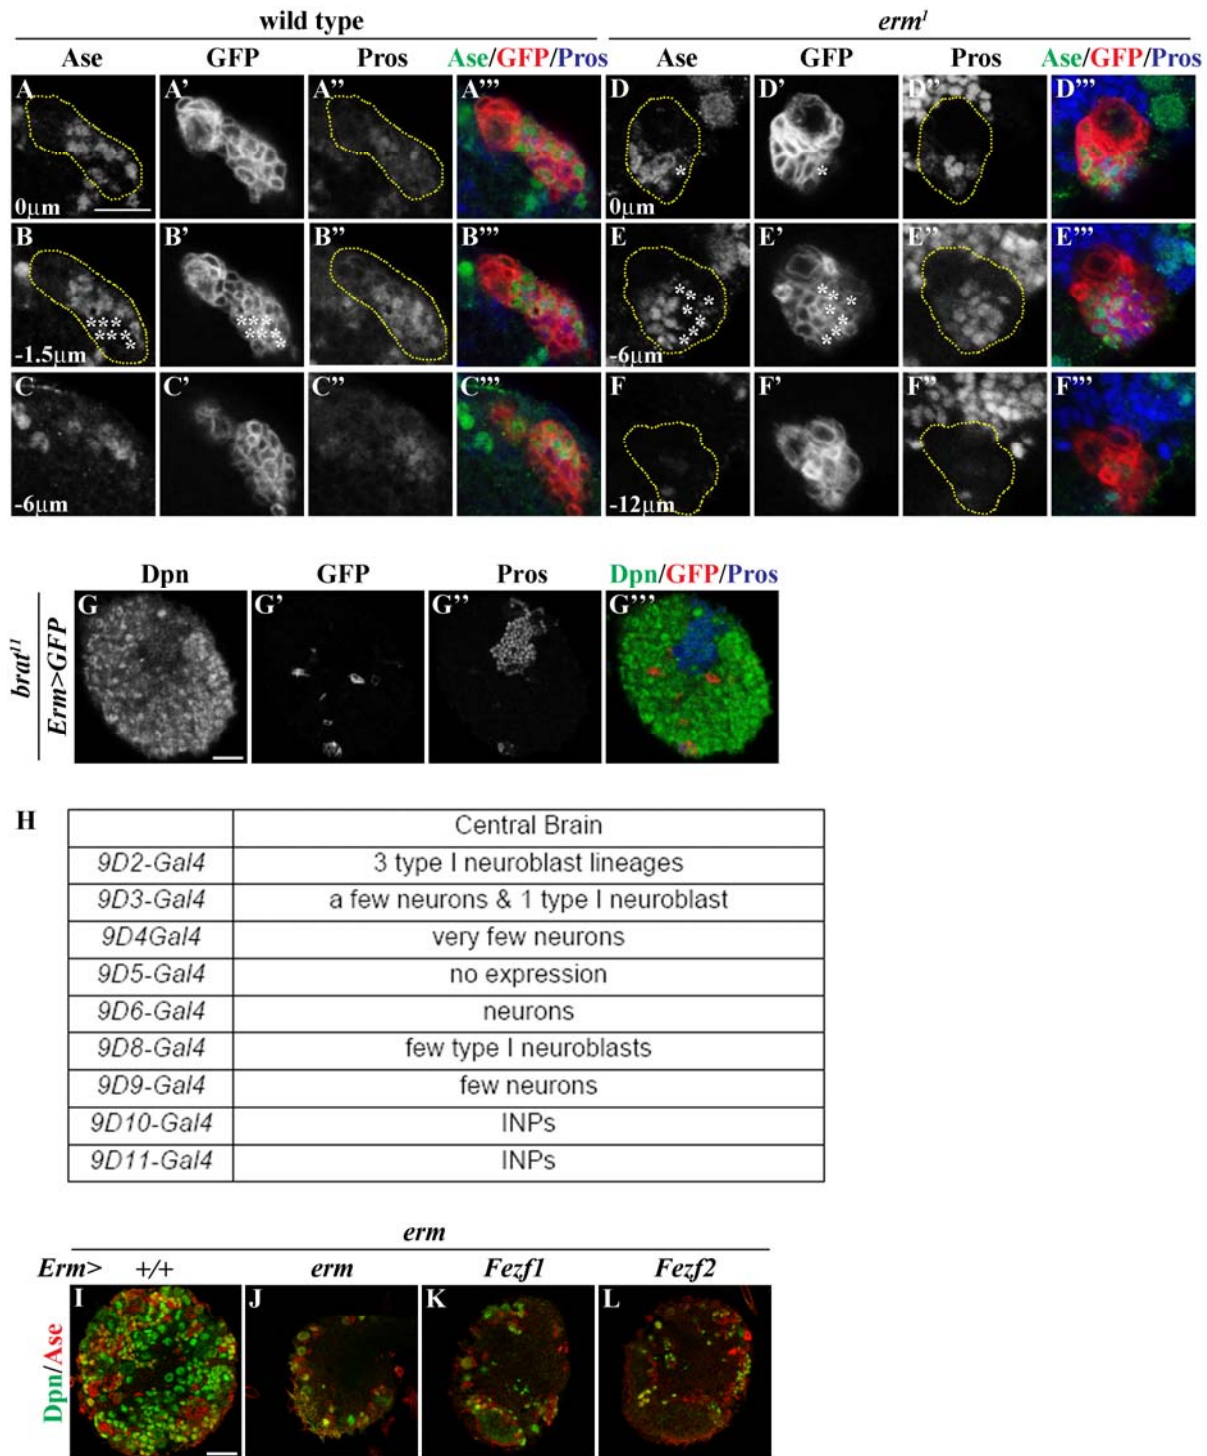

### Figure S2. *erm* prevents INPs from reverting into type II neuroblasts

(A-F) At 48 hrs after clone induction, *erm* mutant type II neuroblast clones (yellow circles) contained fewer INPs ( $Ase^+Pros^-$ ), GMCs ( $Ase^+Pros^+$ ) and neurons ( $Ase^-Pros^+$ ; white asterisks) compared to similarly staged wild type neuroblast clones.

(G) The expression pattern of the *R9D* series of *Gal4* lines.

(H) The expression of *Erm-Gal4* in *brain tumor (brat)* mutant brains was undetected in ectopic type II neuroblasts and immature INPs despite a dramatic increase in their population.

(I-L) Over-expression of *erm*, *Fezf1* and *Fezf2* in INPs efficiently restored the *Erm* function and rescued the ectopic neuroblast phenotype in *erm* mutant brains.

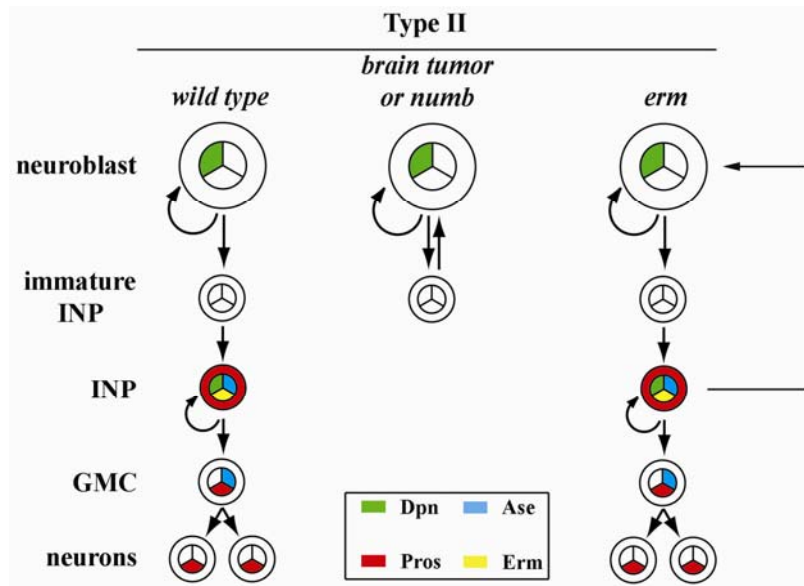

**Figure S3. Type II neuroblast lineages in wild-type and mutant larval brains**
